# Supplementary material
Source: PubMed Central journal article supplement (PMC7391053)

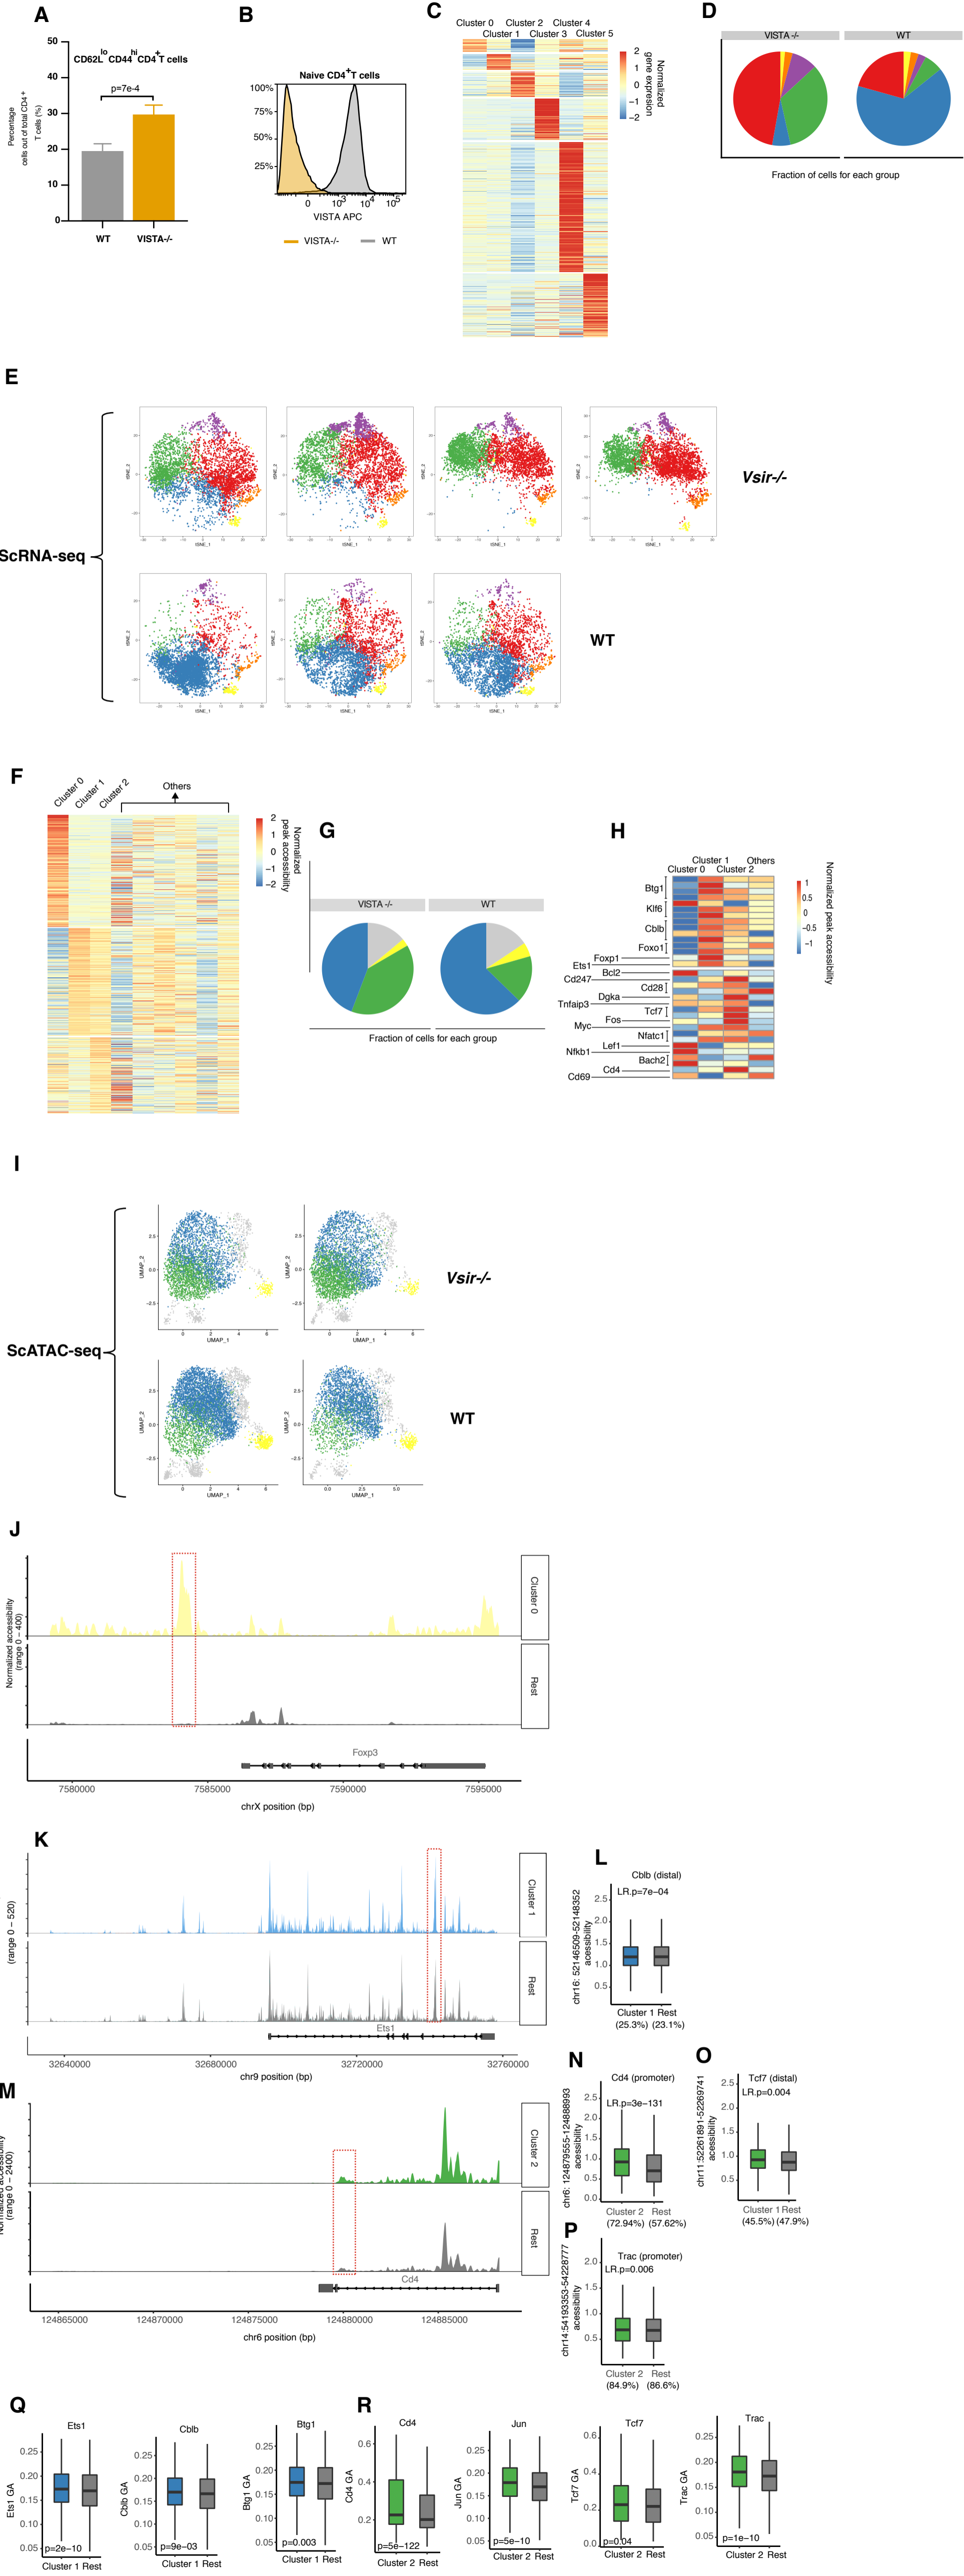

Supplement: NIHMS1596468-supplement-Figure_S1.pdf [file NIHMS1596468-supplement-Figure_S1.pdf]
